# Supplementary material for: Multimodal Radiofrequency Application for Lower Face and Neck Laxity
Source: PubMed Central journal article supplement — Plast Reconstr Surg Glob Open. 2020 Aug 26;8(8):e2862. doi: 10.1097/GOX.0000000000002862 (PMC7489644; doi:10.1097/gox.0000000000002862), 2020-08-26
Supplement: gox-8-e2862-s005.pdf [file gox-8-e2862-s005.pdf]

| <b>Variable</b>         | <b>Mean or Percentage</b> |
|-------------------------|---------------------------|
| Sex (Male)              | 8.72%                     |
| Smoker (Yes)            | 27.06%                    |
| Prior Liposuction (Yes) | 2.29%                     |
| Weight (kg)             | 69.06                     |
| Age (Older)             | 49.08%                    |
| BMI                     | 24.41                     |
| Right Jowl Energy       | 2.75                      |
| Left Jowl Energy        | 2.75                      |
| Neck Energy             | 3.14                      |
