# Supplementary figures and images for: Multimodal Radiofrequency Application for Lower Face and Neck Laxity
Source: PubMed Central journal article supplement — Plast Reconstr Surg Glob Open. 2020 Aug 26;8(8):e2862. doi: 10.1097/GOX.0000000000002862 (PMC7489644; doi:10.1097/gox.0000000000002862), 2020-08-26

## Baker Face Neck Classification

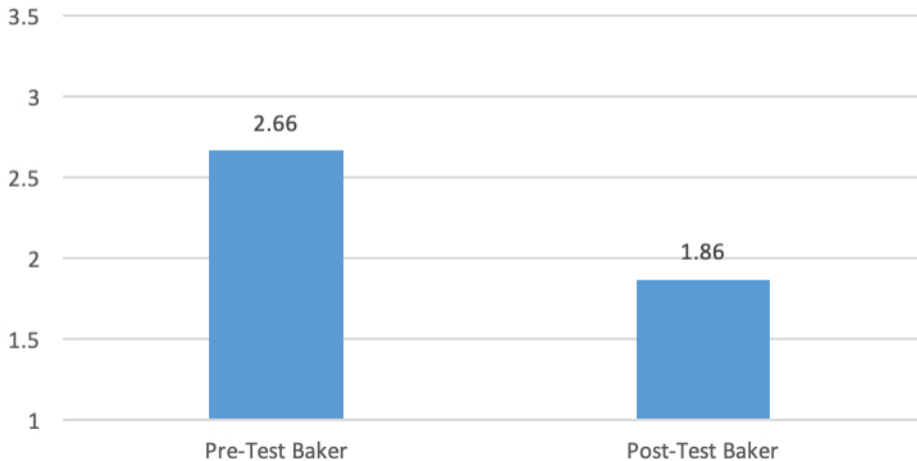

Supplement: gox-8-e2862-s004.pdf [file gox-8-e2862-s004.pdf]

## Baker Face Neck Classification by Age and Treatment

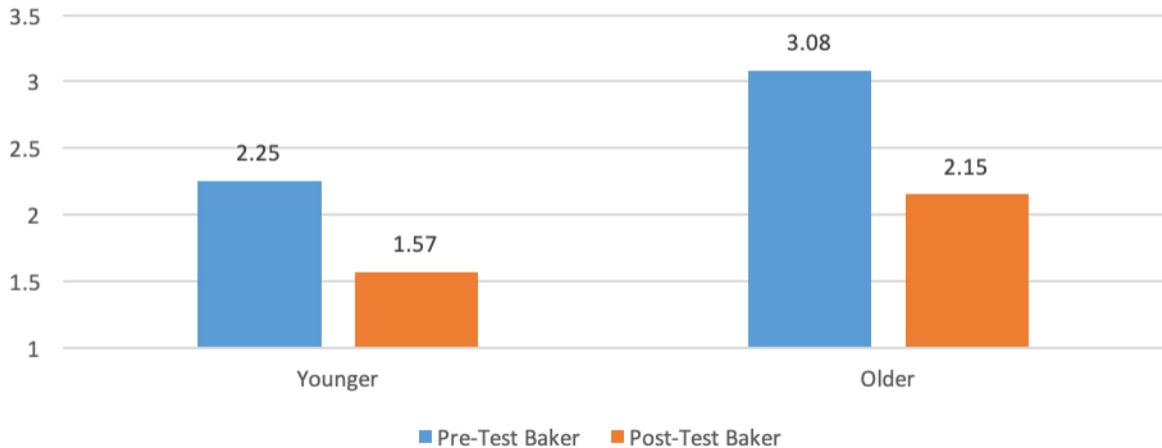

Supplement: gox-8-e2862-s006.pdf [file gox-8-e2862-s006.pdf]
